# Supplementary material for: An E-Learning intervention for Reducing presenteeism among employees in a Swiss insurance company – A quasi-experimental study
Source: Research Square preprint supplement (doi:10.21203/rs.3.rs-6975318/v1), 2025-07-30
Supplement: Supplementary file 1 [file 78e981e10e32aec678080e35.docx]

# Appendix B: Overview of the included studies

| Nr. | Autor (Year) | Titel |
| --- | --- | --- |
| 1 | Aegerter et al. (2020) | On-site multi-component intervention to improve productivity and reduce the economic and personal burden of neck pain in Swiss office-workers (NEXpro) |
| 2 | Anan et al. (2021) | Effects of an Artificial Intelligence-Assisted Health Program on Workers With Neck/Shoulder Pain/Stiffness and Low Back Pain |
| 3 | Barbosa et al. (2015) | Return on Investment of a Work-Family Intervention Evidence From the Work, Family, and Health Network. |
| 4 | Beemster et al. (2015) | Cost-effectiveness of 40-hour versus 100-hour vocational rehabilitation on work participation for workers on sick leave due to subacute or chronic musculoskeletal pain: study protocol for a randomized controlled trial. |
| 5 | Bjornaraa et al. (2020) | Effects of a Remotely Delivered Cognitive Behavioral Coaching Program on the Self-Rated Functional Disability of Participants with Low Back Pain. |
| 6 | Bontrager et al. (2020) | Wellness marketing in the corporate context. |
| 7 | Bramberg et al. (2011) | Effects of yoga, strength training and advice on back pain: a randomized controlled trial. |
| 8 | Camerino et al. (2010) | Shiftwork, Work-Family Conflict Among Italian Nurses, and Prevention Efficacy. |
| 9 | Cancelliere et al. (2011) | Are workplace health promotion programs effective at improving presenteeism in workers? a systematic review and best evidence synthesis of the literature. |
| 10 | Chandrasekaran et al. (2021) | SMART STEP - SMARTphone-driven exercise and pedometer-based STEP intervention to promote physical activity among desk-based employees: Study protocol for a three-arm cluster randomized controlled trial. |
| 11 | Cheung et al. (2019) | The effectiveness of a multidisciplinary exercise program in managing work-related musculoskeletal symptoms for low-skilled workers in the low-income community: a pre-post-follow-up study. |
| 12 | Christensen et al. (2016) | Background, design and conceptual model of the cluster randomized multiple-component workplace study: FRamed Intervention to Decrease Occupational Muscle pain - "FRIDOM". |
| 13 | Coffeng et al. (2014) | Effectiveness of a combined social and physical environmental intervention on presenteeism, absenteeism, work performance, and work engagement in office employees |
| 14 | Edwardson et al. (2018) | A three arm cluster randomised controlled trial to test the effectiveness and cost- effectiveness of the SMART Work & Life intervention for reducing daily sitting time in office workers: study protocol. |
| 15 | Edwardson et al. (2018) | Effectiveness of the Stand More AT (SMArT) Work intervention: cluster randomised controlled trial. |
| 16 | Frutiger et al. (2017) | Chiropractic curriculum mapping and congruence of the evidence for workplace interventions in work-related neck pain. |
| 17 | Hatch et al. (2019) | Back Pain: Lost Productivity, Associated Costs and a Solution. In: 20th European Conference on Knowledge Management (ECKM) |
| 18 | Healy et al. (2013) | Reducing sitting time in office workers: short-term efficacy of a multicomponent intervention. |
| 19 | Hendriksen et al. (2016) | Effectiveness of a Multilevel Workplace Health Promotion Program on Vitality, Health, and Work-Related Outcomes. |
| 20 | Hergenroeder et al. (2022) | Effect of a 6-month sedentary behavior reduction intervention on well-being and workplace health in desk workers with low back pain. |
| 21 | Huff et al. (2016) | Stress and Presenteeism Among Kansas Hospital Employees: What Stress Reduction Interventions Might Hospitals Benefit From Offering to Employees? |
| 22 | Hunter et al. (2016) | Effectiveness and cost-effectiveness of a physical activity loyalty scheme for behaviour change maintenance: a cluster randomised controlled trial. |
| 23 | Hutting et al. (2020) | The effects of integrating work-related factors and improving cooperation in musculoskeletal physical therapy practice: protocol for the 'WORK TO BE DONE' cluster randomised controlled trial. |
| 24 | Imai et al. (Jahr) | Effect of pain neuroscience education and exercise on presenteeism and pain intensity in health care workers: A randomized controlled trial. |
| 25 | Karimi et al. (2019) | Positive effects of workplace meditation training and practice. |
| 26 | Komp et al. (2022) | The Concept of Health-Promoting Collaboration-A Starting Point to Reduce Presenteeism? |
| 27 | Liu et al. (2020) | The influence of team mindfulness on nurses' presenteeism: A cross‐sectional study from the perspective of sensemaking. |
| 28 | Liu et al. (2020) | Influence of Workplace Safety Climate on Chinese Healthcare Employees' Presenteeism from the Perspective of Affect and Cognition. |
| 29 | Martin et al. (2009) | Promoting mental health in small-medium enterprises: An evaluation of the "Business in Mind" program. |
| 30 | Mazzetti et al. (2019) | Promoting mental health in small-medium enterprises: An evaluation of the "Business in Mind" program. |
| 31 | Medina-Garrido et al. (2020) | I Can't Go to Work Tomorrow! Work-Family Policies, Well-Being and Absenteeism. |
| 32 | Michielsens et al. (2014) | Managing diversity through flexible work arrangements: management perspectives. |
| 33 | Molin et al. (2021) | Can the Human Resources Index (HRI) Be Used as a Process Feedback Measurement in a Structured Support Model for Systematic Work Environment Management? |
| 34 | Peron et al. (2022) | A decision support system for designing win-win interventions impacting occupational safety and operational performance in ageing workforce contexts. |
| 35 | Schwatka et al. (2018) | The Impact of Worksite Wellness Programs by Size of Business: A 3-Year Longitudinal Study of Participation, Health Benefits, Absenteeism, and Presenteeism. |
| 36 | Steultjens et al. (2012) | Organizational leadership, health risk screening, individually tailored programs, and supportive workplace culture might reduce presenteeism. |
| 37 | Sun et al. (2020) | A blended intervention to promote physical activity, health and work productivity among office employees using intervention mapping: a study protocol for a cluster-randomized controlled trial. |
| 38 | Sun et al. (2020) | Moderating role of enterprise social media use in work engagement. |
| 39 | Theorell et al. (2010) | Leadership and employee health. Contemporary occupational health psychology: Global perspectives on research and practice. |
| 40 | Vonderlin et al. (2021) | Effectiveness of a mindfulness-and skill-based health-promoting leadership intervention on supervisor and employee levels: A quasi-experimental multisite field study. |
| 41 | Washington et al. (2019) | Digital Technologies and Technostressors, a Surprising Paradox for Productivity and Work/Home Conflict |
| 42 | Yang et al. (2020) | Effect of Work Environment on Presenteeism among Aging American Workers: The Moderated Mediating Effect of Sense of Control. |
