# Supplementary material for: An E-Learning intervention for Reducing presenteeism among employees in a Swiss insurance company – A quasi-experimental study
Source: Research Square preprint supplement (doi:10.21203/rs.3.rs-6975318/v1), 2025-07-30
Supplement: Supplementary file 2 [file b29e674a69a235f792928f5b.docx]

| **Topics** | **Content** | **Course** | | | |
| --- | --- | --- | --- | --- | --- |
| **Session 1: Knowledge** | | **1** | **2** | **3** | **4** |
| 1.1 Welcome and Introduction | Camila, the avatar introduces herself. She accompanies the participants through the e-learning and the three sessions. | X | X | X | X |
| 1.2 Definition Presenteeism | Presenteeism is defined in an explanatory video and the risks and consequences are described. | X | X | X | X |
| Participants are asked to fill out a free text form with the question:  What comes to mind when you hear presenteeism?  Write down three to five keywords in the text field below: |
| The prevalence of presenteeism behavior is presented graphically based on the data collected from T0. The graphs are interactive and allow the data to be compared on a sector-specific basis. |
| 1.3 Risk Factors of Presenteeism | Participants are asked to fill in a word cloud with risk factors of presenteeism from their perspective. The data is aggregated across all participants and then presented graphically to the participants in the session. | X | X | X | X |
| A cloze text with a description of risk facts, known from the scientific literature, must be filled in correctly by the participants. The words are already available and must be placed in the correct position. They can check their task on completion and receive feedback on how correct their information was. |
| 1.4 Consequences of Presenteeism | A continuous text with a description of the possible consequences of presenteeism is available for reading. The consequences are visualized with easy-to-understand pictograms. | X | X | X | X |
| 1.5 Conclusion or interim status | Participants are asked to correctly assign the risk factors (individual, organizational) and consequences in a drag & drop graphic based on the framework from Lohaus and Habermann (2019) as a learning check. They can check the correctness again. | X | X | X | X |
| 1.6 Team and leadership culture | In an explanatory video, Camila shows the connection between team and leadership culture and presenteeism. |  | X |  | X |
| 1.7 Experience of illness | An explanatory video with the avatar “Max” shows that the experience of illness is subjective and that each person can experience symptoms differently and therefore also perceive differently whether they feel too ill to work or not. | X | X |
| Participants are then asked to fill in free text fields on the following questions to reflect on the topic: If you were Max, how would you have behaved in this situation? What criteria help you decide whether to work or call in sick? |
| Another explanatory video uses Max to show that he is very conscientious and finds it difficult to call in sick. The video explains how the team reacts to him and how Max and the team benefit in the short and medium term from the open and benevolent recommendation to recover. |
| Participants are then asked to fill in free text fields on the following questions to reflect on the topic: Thinking of Max's example, what do you think your colleagues at work think when you call in sick? What do you think your line manager thinks when you call in sick? |
| A graph shows how differently certain types perceive symptoms and in which sector which types tend to cluster. The types were identified using vignettes and described in an article (Golz et al., 2024) |
| 1.8 Definition of health | In a cloze text, health is defined on the basis of sociologist Aaron Antonovsky's salutogenesis and the participants have to place the key terms in the right place. |  | X |  | X |
| 1.9 Rights and obligations to report sick | The rights and obligations to report sick in Switzerland are illustrated in an interactive picture. It deals with the medical certificate, termination and notification of illness, reduction of the degree of employment, probationary period, information on diagnosis(es) and incapacity for work |  | X |  | X |
| 1.10 Conditions of the musculoskeletal system | Camila, the avatar, explains that presenteeism is linked to various chronic conditions, particularly musculoskeletal disorders. |  |  | X | X |
| Data from the baseline measurement is presented graphically on the musculoskeletal system, such as prevalence and correlation with presenteeism. |  |  | X | X |
| 1.11 Backgorund musculoskeletal system | Musculoskeletal complaints can have consequences for the whole body and can be exacerbated by life circumstances. The various complaints are summarized in an interactive picture. |  |  | X | X |
| 1.12 promoting well-being | An explanatory video shows that exercise promotes well-being. It shows how much we sit at work and what effects it has on us. Participants play a memory game that includes various measures for getting up and moving around in everyday life. The measures were developed by the Swiss Federal Office of Public Health and made available as posters and flyers. |  |  | X | X |
| 1.13 Ergonomics in the workplace | Ergonomics in the workplace means working in an environment that is tailored to your personal needs, both physical and mental, and offers maximum comfort. An explanatory video from the participating insurance company presents and explains measures to promote ergonomics in the workplace. |  |  | X | X |
| Assignment 1 | Until the next session, participants are invited to reflect on their presenteeism behavior and the mechanisms that cause them to go to work sick. They are given the opportunity to download a calendar entry so that they are reminded to take the time to reflect on this while at work. | X | X | X | X |

| **Topics** | **Content** | **Course** | | | |
| --- | --- | --- | --- | --- | --- |
| **Session 2: Skills** | | **1** | **2** | **3** | **4** |
| 2.1 Recognizing presenteeism | Participants look at how presenteeism can be recognized in themselves and others. | X | X | X | X |
| Participants answer the following questions in free text fields: What have you done particularly well in relation to presenteeism in the last few weeks since taking part in learning unit 1? What have you observed in your environment with regard to dealing with presenteeism? | X | X | X | X |
| Participants receive a checklist with questions that can help them to recognize presenteeism. | X | X | X | X |
| 2.2 Resources in the event of illness | In a text and an interactive picture, resources for illness are listed. One focus is on resources in the event of incapacity to work. The resources are divided into three main categories: feeling ill, the child or a person to be cared for is ill, there is no solution | X | X | X | X |
| 2.3 Giving and accepting feedback | An explanatory video shows what good feedback involves. The AID rule for feedback is also discussed | X | X | X | X |
| 2.4 Practicing giving feedback | In an interactive game, the participants put themselves in the role of a supervisor who has to give feedback to an employee on sickness behavior. They can select different statements, and the story continues differently depending on their choice. Participants also receive feedback in the form of pop-ups about what was good or less appropriate about their choice in the situation and why. | X | X | X | X |
| 2.5 Practicing receiving feedback | In an interactive game, the participants put themselves in the role of an employee who receives feedback from their line manager about their sickness behavior. They can select various statements, with the story continuing differently depending on their choice. Participants also receive feedback in the form of pop-ups about what was good or less appropriate about their choice in the situation and why. | X | X | X | X |
| 2.6 Group dynamics | The team roles according to Belbin are presented in an explanatory video. You can then take a self-test to see which roles you yourself take on in teams. These roles are then placed in the context of team building and explained in another explanatory video. Participants are then asked to answer the following questions: Now think about which role you were assigned or took on in your team. Was this voluntary? How does the role feel? Would you like to take on a different role? |  | X |  | X |
| 2.7 Dealing with conflicts | A text explains what kind of conflict situations can arise in teams and with superiors in the context of health behavior. Then a Havard method for dealing with conflicts is explained in a picture carousel: “Be tough on the issue, but not on the people you are talking to.” | X | X |
| Not all conflicts can be resolved. For this reason, other possible solutions are presented: Distracting, blocking, writing things down, asking questions or walking away. | X | X |
| 2.8 Pain is a warning signal | A text explains that there is a need for action in the event of pain. They receive a recommendation with a checklist on how they can set up their workplace to promote health and are invited to try it out |  | X | X |
| 2.9 Ergonomic working | A variety of checklists and instructions for correct sitting, mouse arm, neck pain etc. for office staff and lifting and carrying, balancing exercises for staff with physical activity are compiled. Most of the instructions were taken from insurance company programs and health promotion organizations. | X | X |
| Assignment 2 | Participants are given the task of giving feedback on their sickness behavior to a colleague or employees until the next session, paying attention to the AID rule and then asking for feedback on how it was received by the other person. | X | X | X | X |

| **Topics** | **Content** | **Course** | | | |
| --- | --- | --- | --- | --- | --- |
| **Session 2: Attitude** | | **1** | **2** | **3** | **4** |
| 3.1 Welcome back | To start with, the participants are asked how they implemented the assignment and how the feedback was received. | X | X | X | X |
| 3.2 Behavioral change | Based on the transtheoretical model with the 5 phases, a text with pictures explains how behavioral change takes place and which phase brings special challenges. | X | X | X | X |
| 3.3 Positive Presenteeism | One text shows that presenteeism is not always necessarily negative. One approach to understanding presenteeism is as a continuum between ill and healthy, or between unproductive and productive. It should clarify that presenteeism cannot be avoided in every context and that there is no need for over-sensitization. | X | X | X | X |
| 3.4 Success Stories | In two videos, two participants in the study explain what has changed for them in dealing with presenteeism as a result of the study. They describe how they have become more aware of the issue and are more mindful when talking to colleagues about it and, as managers, are also more careful when dealing with it in the team because they recognize the benefits of talking and acting about it at an early stage. | X | X | X | X |
| 3.5 Conclusion | All important information is briefly summarized and all documents (flyers, checklists) are listed again for the entire course. | X | X | X | X |

**References**

Golz, C., Hägerbäumer, M., Gerlach, M., Meichtry, A., Kilcher, G., Peter, K. A., & Blozik, E. (2024). Explaining presenteeism behaviour with the theory of planned behaviour – a longitudinal study. *International Archives of Occupational and Environmental Health*, *97*(10), 1051–1062. https://doi.org/10.1007/s00420-024-02108-5

Lohaus, D., & Habermann, W. (2019). Presenteeism: A review and research directions. *Human Resource Management Review*, *29*(1), 43–58. https://doi.org/10.1016/j.hrmr.2018.02.010
